# Supplementary material for: Natural Rubber Composites Using Hydrothermally Carbonized Hardwood Waste Biomass as a Partial Reinforcing Filler—Part II: Mechanical, Thermal and Ageing (Chemical) Properties
Source: MDPI journal article supplement (doi:10.3390/polym15102397), 2023-05-21
Supplement: s1 [file s1]

## **SUPPLEMENTARY INFORMATION**

# **Natural Rubber Composites Using Hydrothermally Carbonized Hardwood Waste Biomass as a Partial Reinforcing Filler—Part II: Mechanical, thermal and Ageing Properties**

**Jelena Lubura <sup>1\*</sup>, Olga Kočková <sup>2</sup>, Beata Strachota <sup>2</sup>, Oskar Bera <sup>1</sup>, Ewa Pavlova <sup>2</sup>, Jelena Pavličević <sup>1\*</sup>,  
Bojana Ikonić <sup>1</sup>, Predrag Kojić <sup>1</sup> and Adam Strachota <sup>2\*</sup>**

<sup>1</sup> University of Novi Sad, Faculty of Technology Novi Sad, Bulevar cara Lazara 1, 21000 Novi Sad, Serbia

<sup>2</sup> Institute of Macromolecular Chemistry, Czech Academy of Sciences, Heyrovského nam. 2, CZ-162 00 Praha, Czech Republic

\* Correspondence: jelenalubura@uns.ac.rs (J.L.); jpavlicevic@uns.ac.rs (J.P.);  
strachota@imc.cas.cz (A.S.)

# 1 Thermogravimetric analysis

## In Air:

**SI-Table S1:** TGA in air: Evaluation of residues and steps.

| Sample | ZnO<br>(%) | ash<br>(TGA)<br>(%) | ash<br>minus<br>ZnO<br>(%) | CB<br>(%) | HC<br>(%) | ZnO<br>+CB<br>(%) | ash<br>+CB<br>(%) | 2 <sup>nd</sup><br>step<br>(%) | 2 <sup>nd</sup><br>minus<br>ash<br>&CB(*)<br>(%) | ZnO<br>+CB<br>+HC<br>(%) | ash<br>+CB<br>+HC<br>(%) | 1 <sup>st</sup> +2 <sup>nd</sup><br>step<br>(%) | 1 <sup>st</sup><br>step<br>(%) | 1 <sup>st</sup> +2 <sup>nd</sup><br>minus<br>[ash<br>&CB<br>&HC]†<br>(%) |
|--------|------------|---------------------|----------------------------|-----------|-----------|-------------------|-------------------|--------------------------------|--------------------------------------------------|--------------------------|--------------------------|-------------------------------------------------|--------------------------------|--------------------------------------------------------------------------|
| matrix | 3.67       | 4.75                | 1.08                       | 0.00      | 0.00      | 3.67              | 4.75              | none                           | n.a.                                             | 3.67                     | 4.75                     | 9.10                                            | 4.35                           | 4.35                                                                     |
| VCB00  | 2.52       | 3.53                | 1.01                       | 0.00      | 31.45     | 2.52              | 3.53              | none                           | n.a.                                             | 33.97                    | 34.98                    | 30.50                                           | 30.50                          | -4.48                                                                    |
| VCB10  | 2.52       | 3.74                | 1.22                       | 6.29      | 25.16     | 8.81              | 10.03             | 10.5                           | 0.47                                             | 33.97                    | 35.19                    | 30.00                                           | 19.50                          | -5.19                                                                    |
| VCB20  | 2.52       | 4.25                | 1.73                       | 12.58     | 18.87     | 15.10             | 16.83             | 17                             | 0.17                                             | 33.97                    | 35.70                    | 34.00                                           | 17.00                          | -1.70                                                                    |
| VCB30  | 2.52       | 4.26                | 1.74                       | 18.87     | 12.58     | 21.39             | 23.13             | 24                             | 0.87                                             | 33.97                    | 35.71                    | 35.50                                           | 11.50                          | -0.21                                                                    |
| VCB40  | 2.52       | 3.65                | 1.13                       | 25.16     | 6.29      | 27.68             | 28.81             | 29.5                           | 0.69                                             | 33.97                    | 35.10                    | 38.50                                           | 9.00                           | 3.40                                                                     |
| VCB50  | 2.52       | 3.57                | 1.05                       | 31.45     | 0.00      | 33.97             | 35.02             | 35.0                           | -0.02                                            | 33.97                    | 35.02                    | 42.00                                           | 7.00                           | 6.98                                                                     |

\*) physical meaning: additional ash

†) physical meaning: charred rubber matrix

## In Nitrogen:

**SI-Table S2:** TGA in N<sub>2</sub>: Evaluation of residues.

| Sample | Residue<br>at 900°C<br>(%) | residue<br>other than<br>ZnO(*)<br>(%) | CB<br>content<br>(%) | HC<br>content<br>(%) | non-CB &<br>non-ZnO<br>residue<br>(%) | HC<br>carbonized<br>fraction†<br>(% of orig.) |
|--------|----------------------------|----------------------------------------|----------------------|----------------------|---------------------------------------|-----------------------------------------------|
| matrix | 5.10                       | 2.58                                   | 0                    | 0                    | 2.58                                  | n.a.                                          |
| VCB00  | 19.30                      | 16.78                                  | 0                    | 31.45                | 16.78                                 | 53.4                                          |
| VCB10  | 20.30                      | 17.78                                  | 6.29                 | 25.16                | 11.49                                 | 45.7                                          |
| VCB20  | 24.94                      | 22.42                                  | 12.58                | 18.87                | 9.84                                  | 52.1                                          |
| VCB30  | 28.17                      | 25.65                                  | 18.87                | 12.58                | 6.78                                  | 53.9                                          |
| VCB40  | 31.61                      | 29.09                                  | 25.16                | 6.29                 | 3.93                                  | 62.5                                          |
| VCB50  | 34.65                      | 32.13                                  | 31.45                | 0                    | 0.68                                  | n.a.                                          |

\*) ZnO content: 2.52%

†) under the simplified assumption, that all the carbonized fraction originates exclusively in HC (not from matrix)

## 2 Thermo-oxidative aging tests

### 2.1 Mass losses

**SI-Table S3:** Weight loss of the natural rubber samples during the thermo-oxidative aging test.

|        | Relative mass after specific oxidation time, % |        |        |         |         |
|--------|------------------------------------------------|--------|--------|---------|---------|
|        | 0 min                                          | 30 min | 60 min | 180 min | 360 min |
| matrix | 100                                            | 98.95  | 98.46  | 97.91   | 97.55   |
| VCB00  | 100                                            | 97.60  | 97.21  | 96.71   | 96.54   |
| VCB10  | 100                                            | 97.15  | 98.13  | 96.60   | 96.79   |
| VCB20  | 100                                            | 98.11  | 97.61  | 96.56   | 96.92   |
| VCB30  | 100                                            | 97.81  | 98.26  | 96.96   | 98.52   |
| VCB40  | 100                                            | 98.09  | 98.49  | 97.67   | 97.45   |
| VCB50  | 100                                            | 99.60  | 99.36  | 98.23   | 97.25   |

## 2.2 DMTA analysis after endured thermo-oxidative aging test time

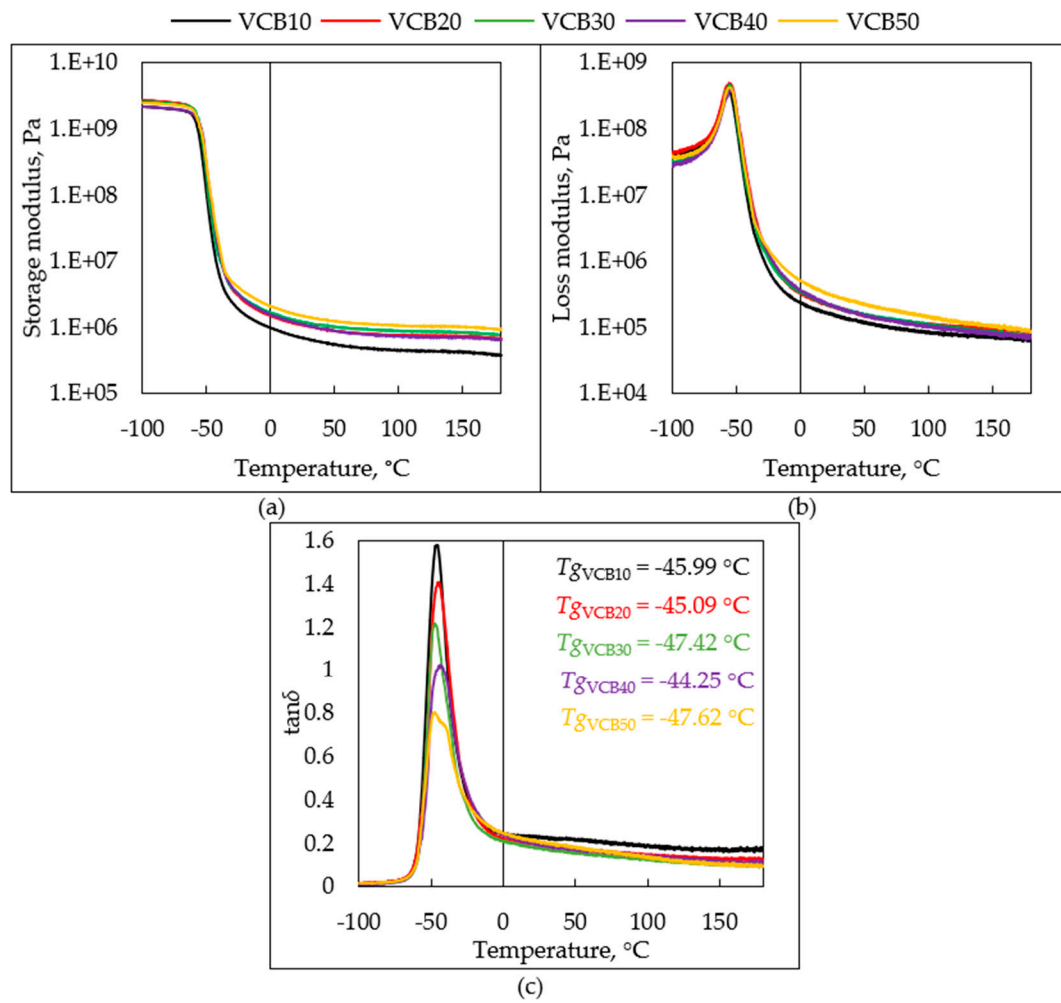

**SI-Figure S1.** 30 min of oxidation: DMTA analysis: (a) storage modulus  $G' = f(T)$ ; (b) loss modulus  $G'' = f(T)$ ; (c)  $\tan \delta = f(T)$ .

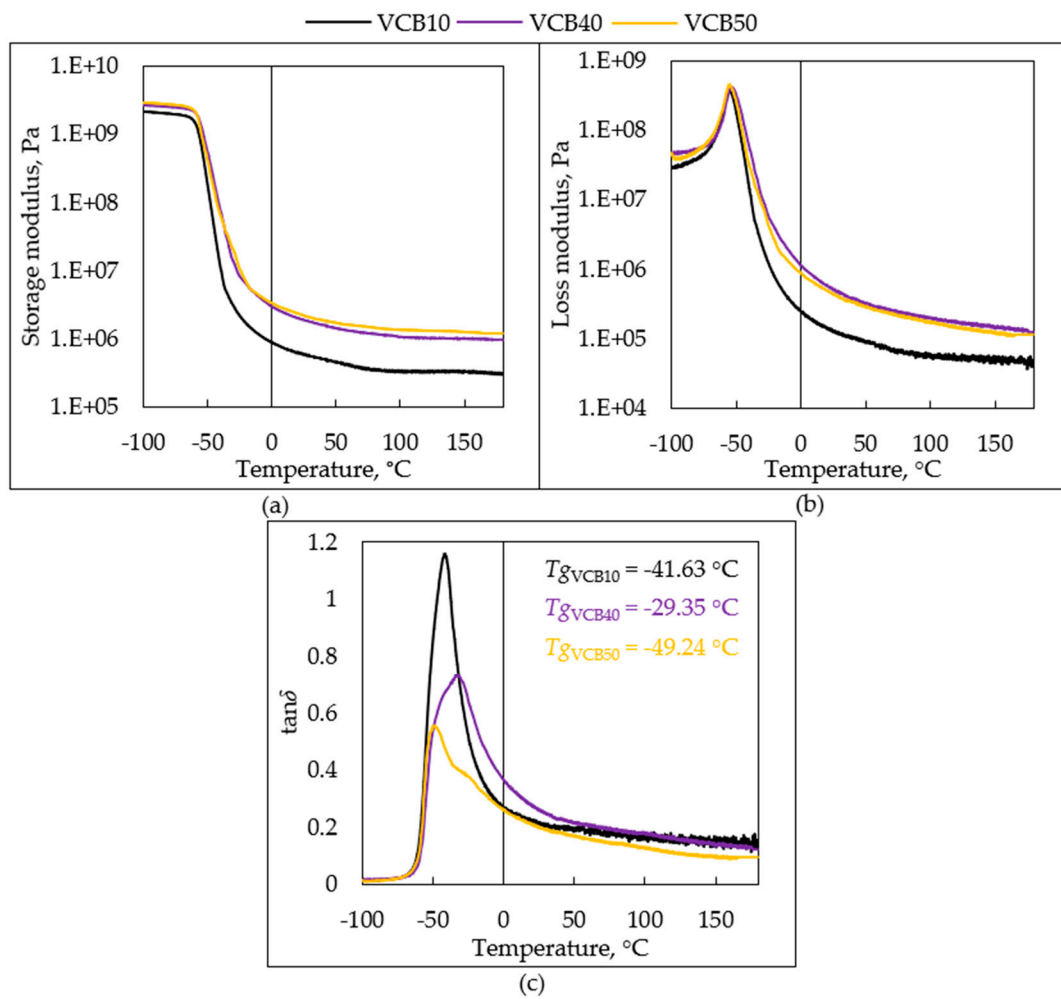

**SI-Figure S2.** 60 min of oxidation: DMTA analysis: (a) storage modulus  $G' = f(T)$ ; (b) loss modulus  $G'' = f(T)$ ; (c)  $\tan \delta = f(T)$ .

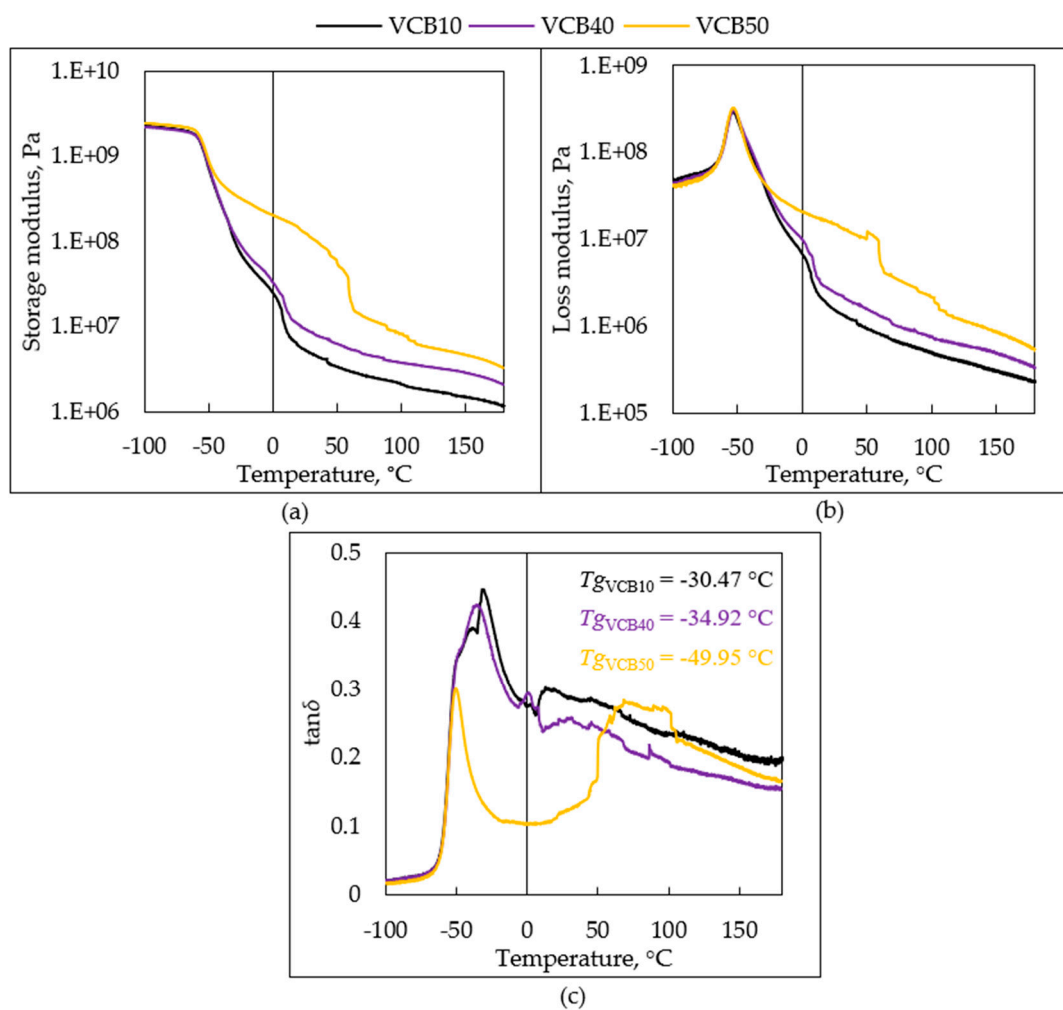

**SI-Figure S3.** 360 min of oxidation: DMTA analysis: (a) storage modulus  $G' = f(T)$ ; (b) loss modulus  $G'' = f(T)$ ; (c)  $\tan \delta = f(T)$ .

### 3 Florida tests

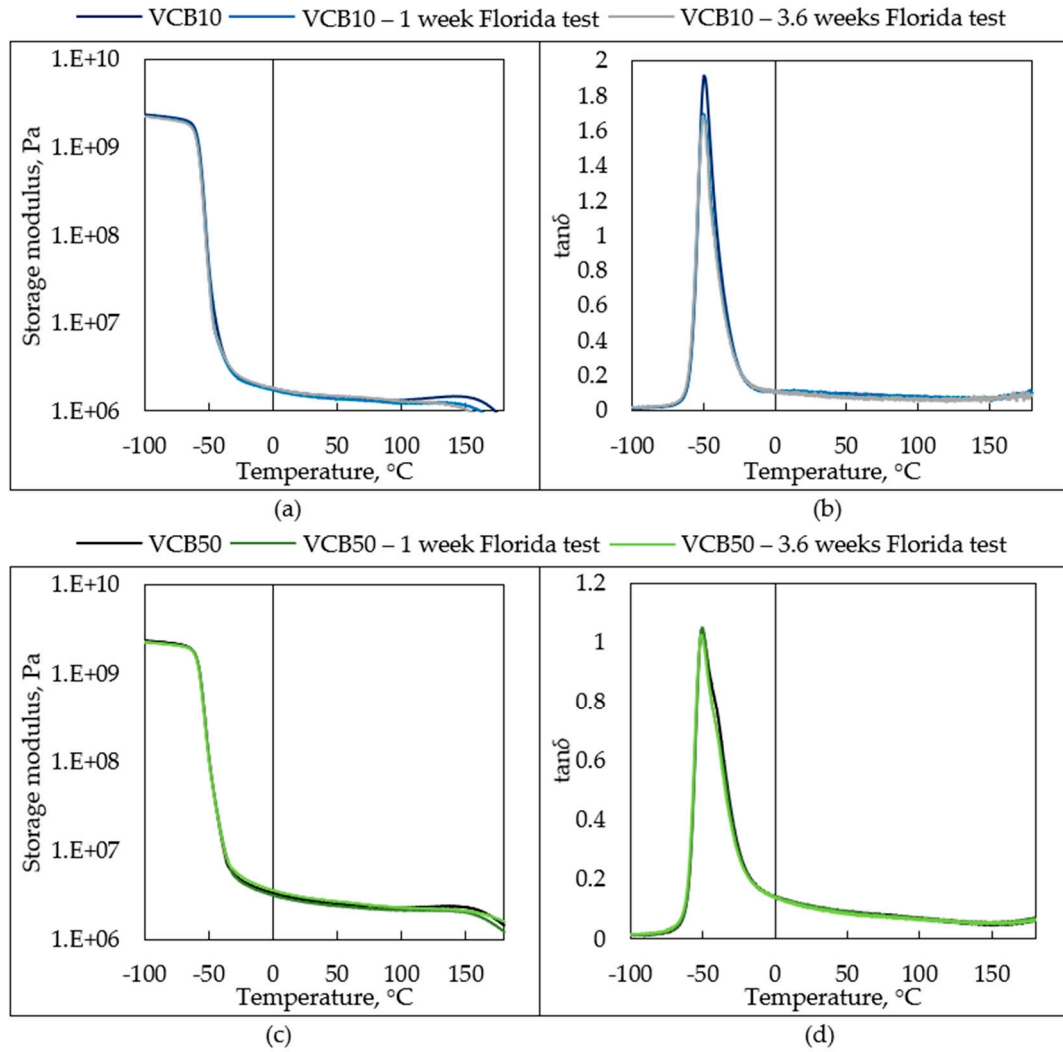

**SI-Figure S4.** DMTA results for the samples (a, b) VCB10 and (c, d) VCB50, in the intact state, after 7 days, and after 25 days of aging in the Florida test (different line colors); the duration of the Florida tests simulates 2¼ and 10 months of aging in hot and humid climate, respectively; (a, c)  $G' = f(T)$ ; (b, d)  $\tan\delta = f(T)$ .

## Trends in $\tan\delta$

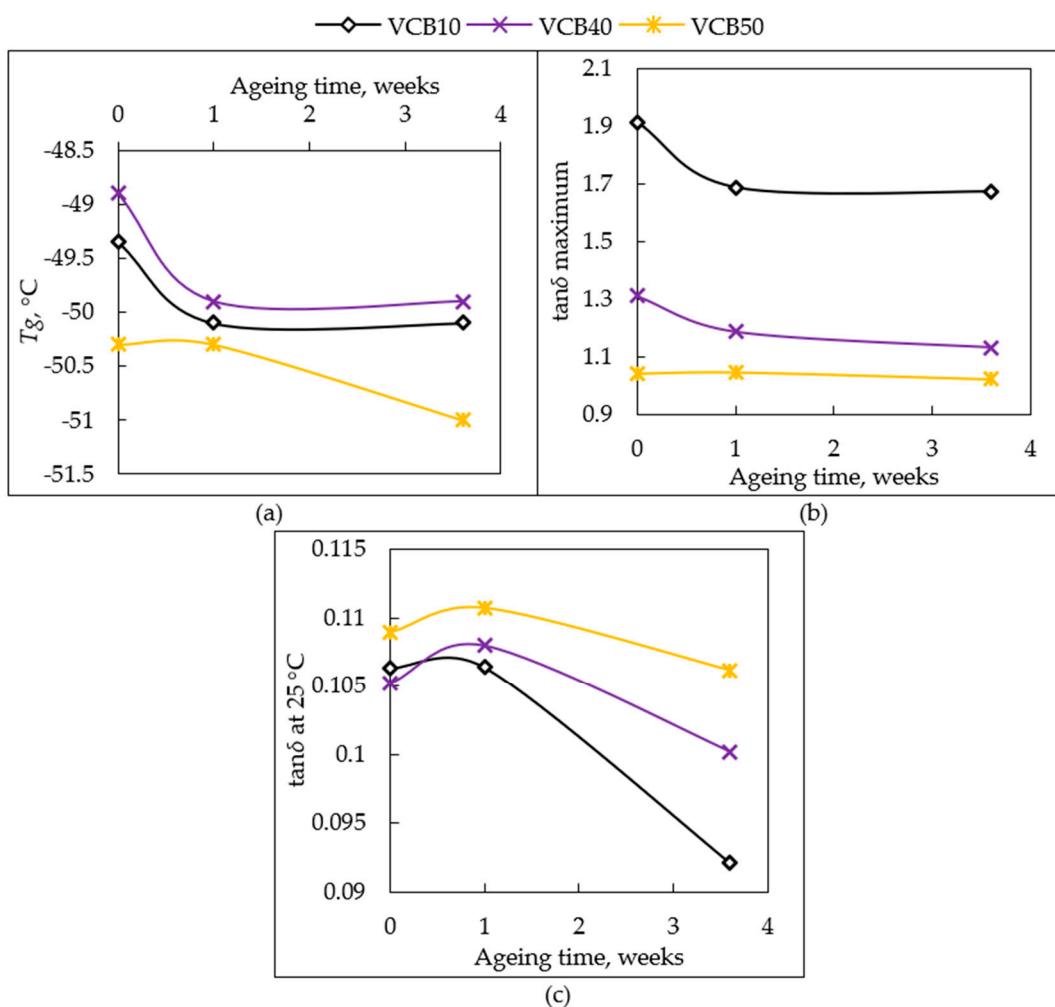

**SI-Figure S5.** Trends in simulated aging (Florida tests) for the samples VCB50 (no hydrochar), VCB40, and VCB10: (a) slight shifts of the glass transition temperature  $T_g$  in dependence on the aging time; (b) modest changes in the height of  $\tan\delta$  peak at  $T_g$ , in dependence on the aging time; (c) slight changes in the  $\tan\delta$  value at 25°C, in dependence on the aging time; note: the aging times of 1 and 3.6 weeks simulate 2¾ and 10 months of aging in hot and humid climate.
